# Supplementary material for: Survival of Veterans Treated with Enzalutamide and Abiraterone for Metastatic Castrate Resistant Prostate Cancer based on Comorbid Diseases
Source: Research Square preprint supplement (doi:10.21203/rs.3.rs-1624365/v1), 2022-05-13
Supplement: Supplementary file 2 [file 9af6d9c114816244534c17c8.docx]

| **Table 1: Comparison between first prescribed abiraterone and enzalutamide in prostate cancer from 9/10/2014 to 6/2/2017** | | | |
| --- | --- | --- | --- |
|
|  | **Total (N=5822)** | | **P-value** |
| **Demographic clinical characteristics** | **first prescribed abiraterone n=3318** | **first prescribed enzalutamide n=2504** |
|
| **Age (mean years)** | 75 | 75.8 | 0.002† |
| **Charlson Comorbidity index** | 4.1 | 4.4 | <0.001† |
| **Elixhauser comorbidities** | 5.9 | 6.3 | 0.002† |
| **Race (%, n)** |  |  | 0.91* |
| **White** | 75.0 (2487) | 74.6 (1867) |  |
| **Black** | 23.1 (765) | 23.4 (586) |  |
| **Other** | 1.8 (60) | 1.9 (48) |  |
| **Unknown** | 0.2 (6) | 0.1 (3) |  |
| **eGFR (%)** |  |  | 0.003* |
| **>=30 mL/min** | 90.2 | 88.3 |  |
| **<30 mL/min** | 3.8 | 3.4 |  |
| **Unknown** | 6.1 | 8.3 |  |
| **Anemia (%)** |  |  | <0.001* |
| **Hgb>=10 g/dL** | 79.3 | 75 |  |
| **Hgb<10 g/dL** | 11.2 | 10.6 |  |
| **Unknown** | 9.5 | 14.4 |  |
| **Bilirubin (%)** |  |  | 0.045* |
| **<2** | 88.9 | 86.9 |  |
| **>=2** | 0.2 | 0.4 |  |
| **Unknown** | 11 | 12.7 |  |
| **Albumin (%)** |  |  | 0.37* |
| **>3 g/dL** | 81 | 79.6 |  |
| **<=3 g/dL** | 6 | 6.3 |  |
| **Unknown** | 13 | 14.2 |  |
| **Docetaxel prior (%, n）** | 10.3 (343) | 9.0 (224) | 0.08* |
| **Docetaxel ever (%）** | 28.4 | 24.4 | <0.001* |
| **Bone agent (%)** | 4.7 | 6.8 | <0.001* |
| **Gleason score (n)** | 7.8 (1602) | 7.9 (1139) | 0.23‡ |
| **PSA closest to start of ARTA (median, n)** | 32.0 (3063) | 27.8 (2245) | <0.001‡ |
| **Received both abiraterone and enzalutamide (%, n)** | 50.6 (1678) | 45.0 (1126) | <0.001* |
| **Received subsequent treatment for mCRPC (%, n)** | 54.9 (1821) | 49.1 (1230) | <0.001* |
| **Time between start of ARTA and subsequent treatment for mCRPC (mean months)** | 13.7 | 15.3 | <0.001† |
| *** Chi-square test** | | | |
| **† T-test** | | | |
| ‡ Wilcoxon Two-Sample Test  ARTA: androgen receptor targeting agent |  |  |  |
